# Supplementary material for: Interaction between monomers of two surfactants derived from the [Ru(2,2′-bpy)3]2+ complex and α, β and γ-cyclodextrins: formation of [2]- and [3]-pseudorotaxanes
Source: Royal Society of Chemistry journal article supplement (doi:10.1039/c3dt32197e), 2013-01-01

## SUPPORTING INFORMATION

INTERACTION BETWEEN MONOMERS OF TWO SURFACTANTS DERIVED  
FROM THE  $[\text{Ru}(2,2'\text{-bpy})_3]^{2+}$  COMPLEX AND  $\alpha$ -,  $\beta$ - AND  $\gamma$ -CYCLODEXTRINS.

FORMATION OF [2]- AND [3]-PSEUDOROTAXANES

M. Lopez-Lopez, F. Montilla, M. Olivares, J.A. Lebron, M.L. Moya,  
and P. Lopez-Cornejo\*

**Figure S1:** Emission intensity values obtained at  $\lambda_{\text{em}}=600$  nm for RuC11 at different surfactant concentrations.

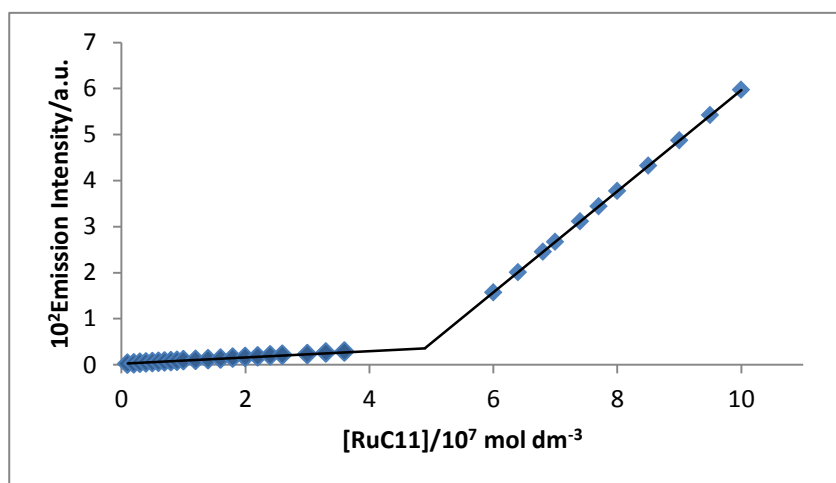

**Figure S2:** Titration of the RuC13 compound with  $\alpha$ -CD ( $[\alpha\text{-CD}] = 0\text{--}1.04 \times 10^{-2} \text{ mol dm}^{-3}$ ).

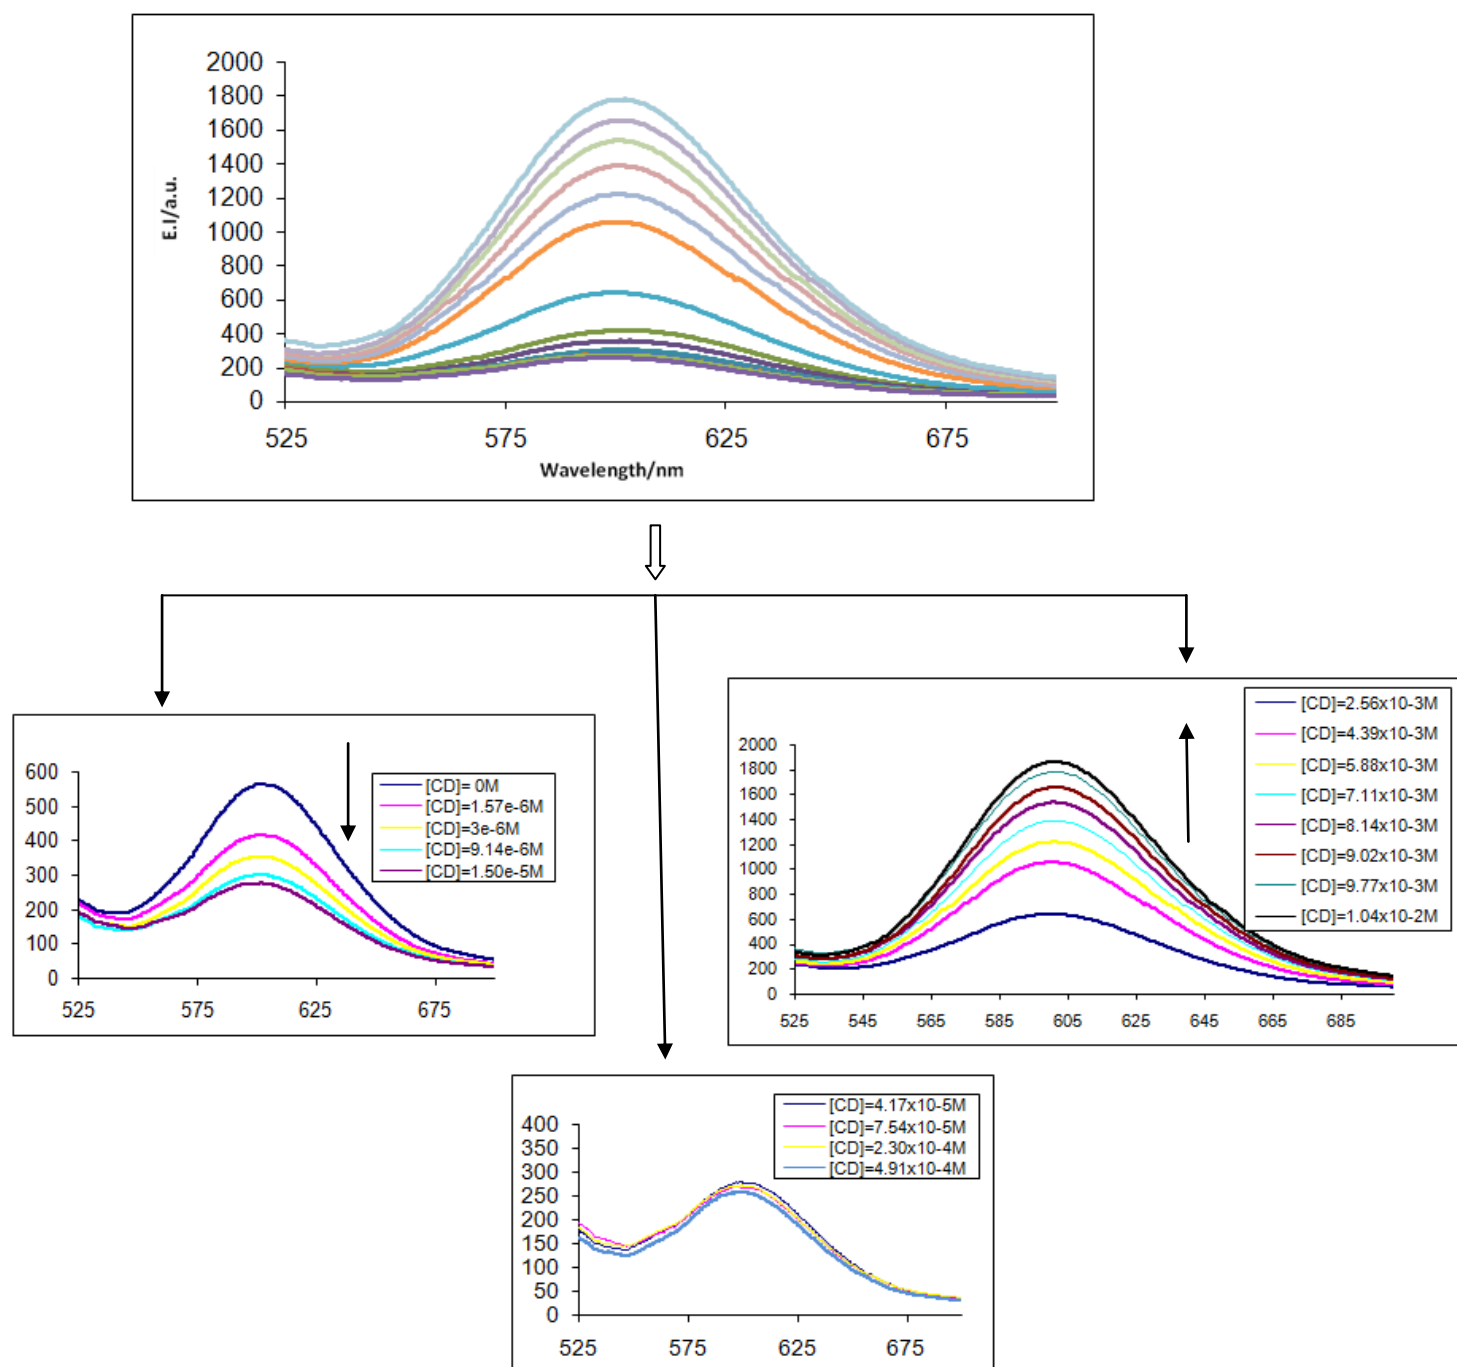

**Figure S3:** Part of 500 MHz 1D  $^1\text{H}$  ROESY NMR spectra showing  $\beta$ -CD protons in presence of RuC11.

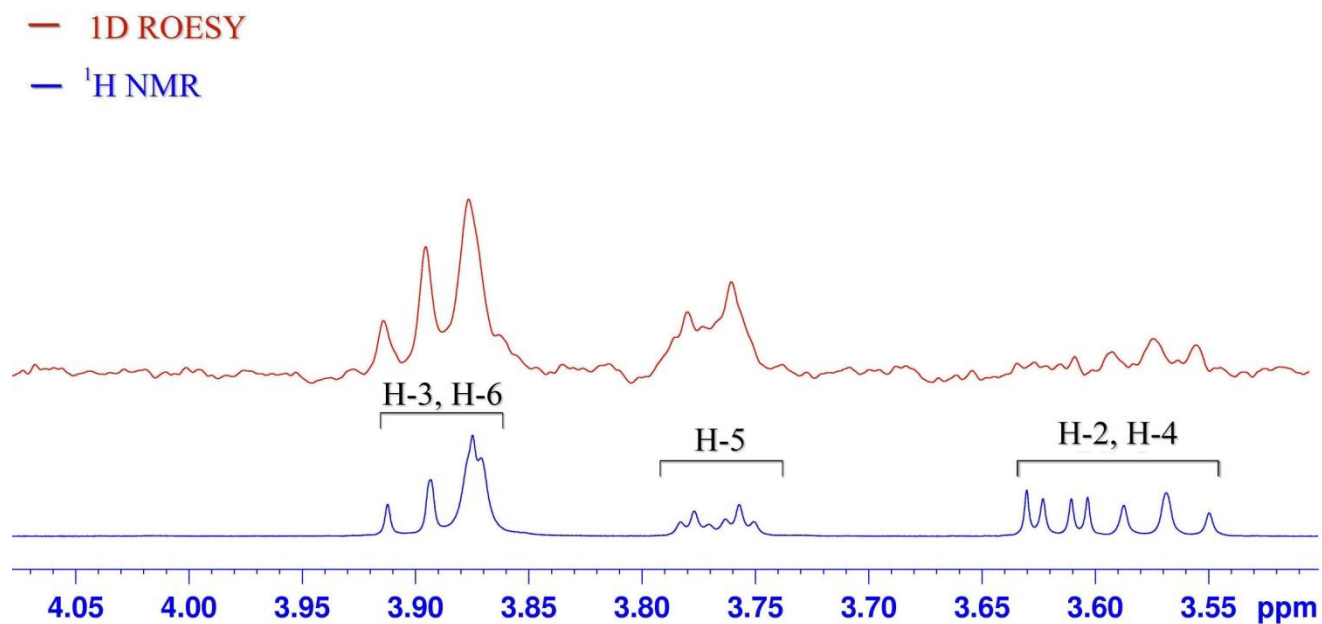

**Figure S4:** Part of 500 MHz 1D  $^1\text{H}$  ROESY NMR spectra showing  $\beta$ -CD protons in presence of RuC13.

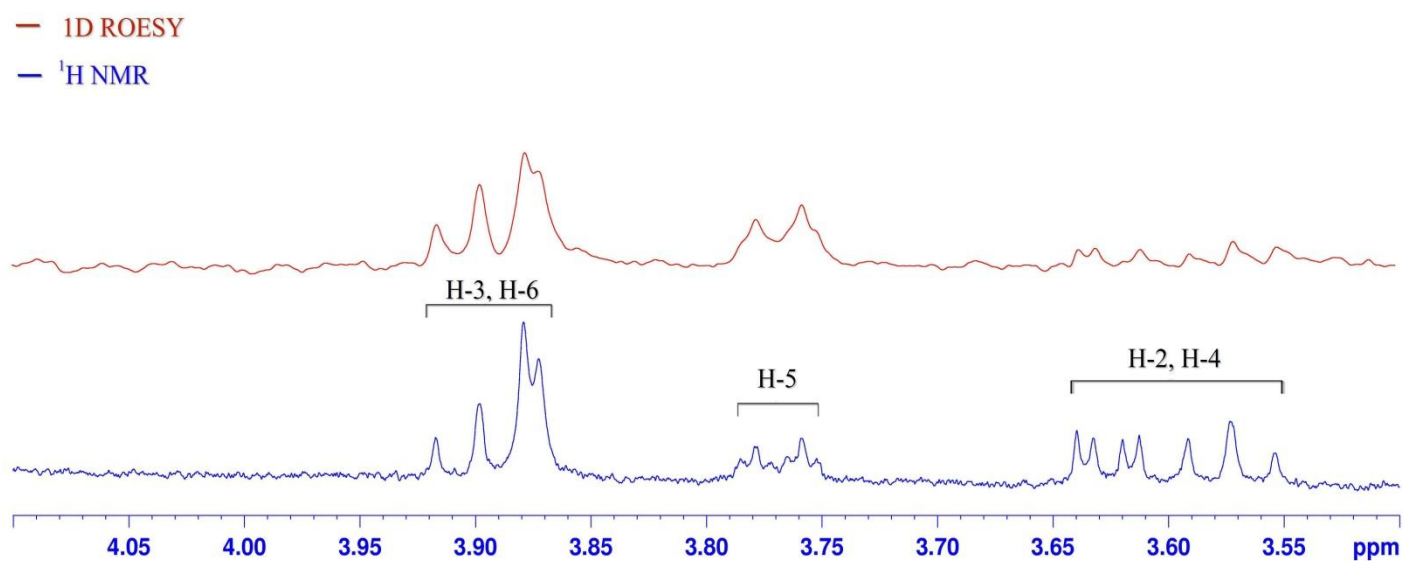

**Figure S5:** Emission intensity values obtained at  $\lambda_{em}=600$  nm for different surfactant concentrations of RuC13 in the presence of  $\alpha$ -cyclodextrin ( $[\alpha\text{-CD}]=1 \times 10^{-4}$  mol dm $^{-3}$ ).

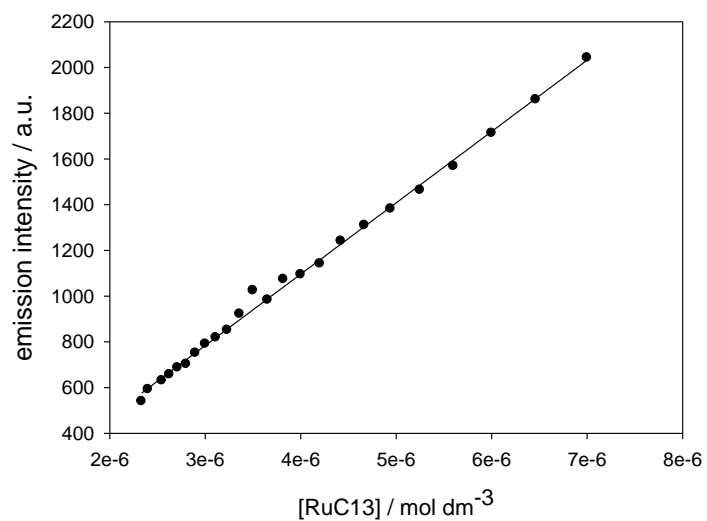

**Figure S6:** General frame of a cyclodextrin

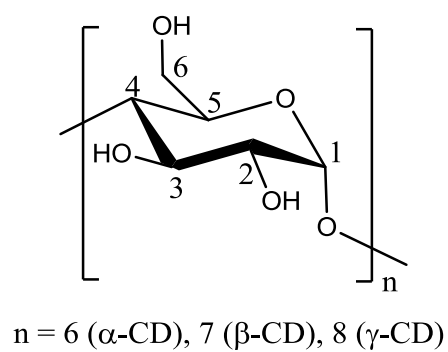

Supplement: c3dt32197e.pdf [file c3dt32197e.pdf]
